# Supplementary material for: Genotypic Comparison of Pasteurella multocida from Healthy Animals at Entry to the Feedlots with That and from Bovine Respiratory Disease-Affected Animals during the Fattening Period
Source: MDPI journal article supplement (doi:10.3390/ani13172687), 2023-08-22
Supplement: s1 [file s1]

Table S2. Virulence associated genes (VAGs) searched in the 67 bovine *P. multocida* genomes belonging to ST13, ST79 and ST80.

| Function                        | VAGs         | Accession number | Description                                                    |
|---------------------------------|--------------|------------------|----------------------------------------------------------------|
| <b>Adhesins</b>                 | <i>hsf1</i>  | AAK02798.1       | Autotransporter adhesion                                       |
|                                 | <i>hsf2</i>  | ANJ91000.1       | Autotransporter adhesion                                       |
|                                 | <i>flp1</i>  | AFF24176.1       | Flp pilin                                                      |
|                                 | <i>ptfA</i>  | AKO69808.1       | Type 4 fimbriae                                                |
|                                 | <i>fimA</i>  | AAK03010.1       | Fimbriae                                                       |
|                                 | <i>pfhA</i>  | AAK61595.1       | Filamentous hemagglutinin                                      |
|                                 | <i>pfhB1</i> | AAK02141.1       | Filamentous hemagglutinin                                      |
|                                 | <i>tadD</i>  | AAK02930.1       | Putative nonspecific tight adherence protein D                 |
| <b>Iron acquisition factors</b> | <i>exbB</i>  | AAK03270.1       | Accessory protein Ton-dependent transport of iron compounds    |
|                                 | <i>exbD</i>  | AAK03271.1       | Accessory protein Ton-dependent transport of iron compound     |
|                                 | <i>fur</i>   | AAK02436.1       | Ferric uptake regulation protein                               |
|                                 | <i>hgbA</i>  | AAQ14873.1       | A hemoglobin-binding protein                                   |
|                                 | <i>hgbB</i>  | APX53047.1       | B hemoglobin-iron uptake                                       |
|                                 | <i>tbpA</i>  | AAK02460.1       | Transferrin binding protein A                                  |
|                                 | <i>tbpB</i>  | AAX55324.1       | Transferrin binding protein B                                  |
|                                 | <i>tonB</i>  | AAK03272.1       | Iron transporters, transport ferric-siderophore complexes      |
| <b>Outer membrane proteins</b>  | <i>plpB</i>  | AAK03814.1       | Lipoprotein B                                                  |
|                                 | <i>plpE</i>  | AAK03601.1       | Lipoprotein E                                                  |
|                                 | <i>ompA</i>  | AFU91511.1       | Outer membrane protein A                                       |
|                                 | <i>ompH</i>  | AAK02472.1       | Outer membrane protein H                                       |
|                                 | <i>OMA87</i> | AAC44600.1       | Outer membrane protein 87                                      |
| <b>Hyaluronidase Sialidases</b> | <i>PmHAS</i> | AAC38318.2       | Hyaluronan synthase                                            |
|                                 | <i>nanB</i>  | AAG35309.1       | Outer membrane-associated proteins, an autotransporter protein |
|                                 | <i>nanH</i>  | AAG35310.1       | Outer membrane-associated proteins, small sialidases           |
| <b>Superoxid dismutases</b>     | <i>sodA</i>  | AAK02085.1       | Superoxide dismutase                                           |
|                                 | <i>sodC</i>  | AAK04036.1       | Superoxide dismutase                                           |
| <b>Toxin</b>                    | <i>toxA</i>  | AAW57319.1       | Dermonecrotic toxin                                            |
